# Supplementary material for: The Adenylate Cyclase-Encoding Gene crac Is Involved in Clonostachys rosea Mycoparasitism
Source: MDPI journal article supplement (doi:10.3390/jof9080861), 2023-08-18
Supplement: s1 [file s1]

**Table S1.** Primers used for quantitative real-time PCR .

| Primers  | Sequence (5'-3')       |
|----------|------------------------|
| EF1F     | TCGATGTCGCTCCTGACT     |
| EF1R     | AGCGTGACCGTTTATTTGA    |
| Cr09722F | CTTGACCAGGTTCTACGG     |
| Cr09722R | GCAGACCAGTTACCCTTCTAT  |
| Cr04111F | TGGGAGAAGAAAGAATGGG    |
| Cr04111R | GGAGTAGTGTCTGGACTGAGAA |
| Cr05604F | GGGCGGAGAAGGCTCGTAA    |
| Cr05604R | GCATCTGGGTCGTCTGAAC    |
| Cr10062F | GCACGCAAGTGATGAAGG     |
| Cr10062R | TTATGCGGATGATGAGGC     |
| Cr07385F | ATTGGCTTGCTATTGAGAT    |
| Cr07385R | GTAATGGTTCCTTGGTG      |
| Cr08476F | GTCTGAGGCAGGCGAGTT     |
| Cr08476R | CCAAATATGCACGATGTCC    |
| Cr05332F | TCTCCCTGTCGTTGAAGT     |
| Cr05332R | GCTGGTCGCTGTTTAGAT     |
| Cr00144F | TTGATTGGAAACGGATTGA    |
| Cr00144R | GTCGTAGCAGCCTTGGAT     |
